# Supplementary material for: Different Seasonal Collections of Ficus carica L. Leaves Diversely Modulate Lipid Metabolism and Adipogenesis in 3T3-L1 Adipocytes
Source: MDPI journal article supplement (doi:10.3390/nu14142833), 2022-07-10
Supplement: s1 [file s1]

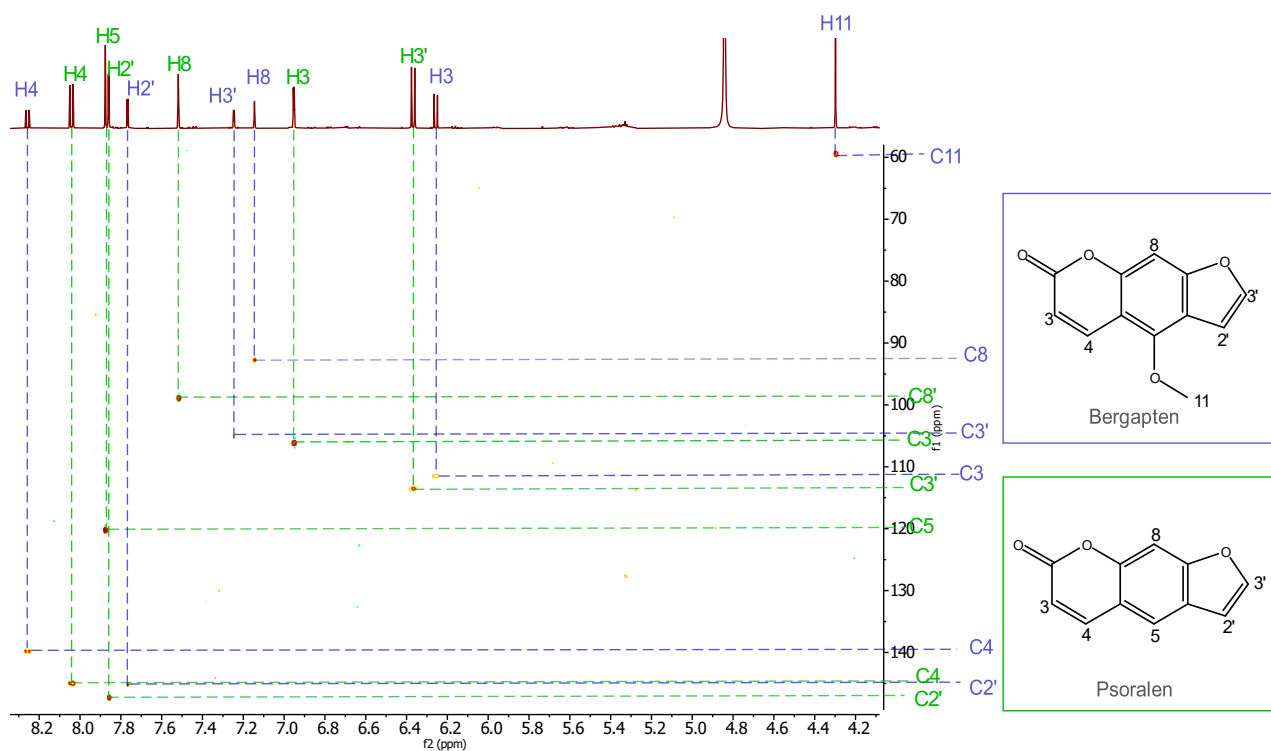

**Figure S1.** HSQC spectrum of *Ficus carica* chloroform fraction where  $^1\text{H}$ - $^{13}\text{C}$  correlations of bergapten (blue) and psoralen (green) are highlighted.

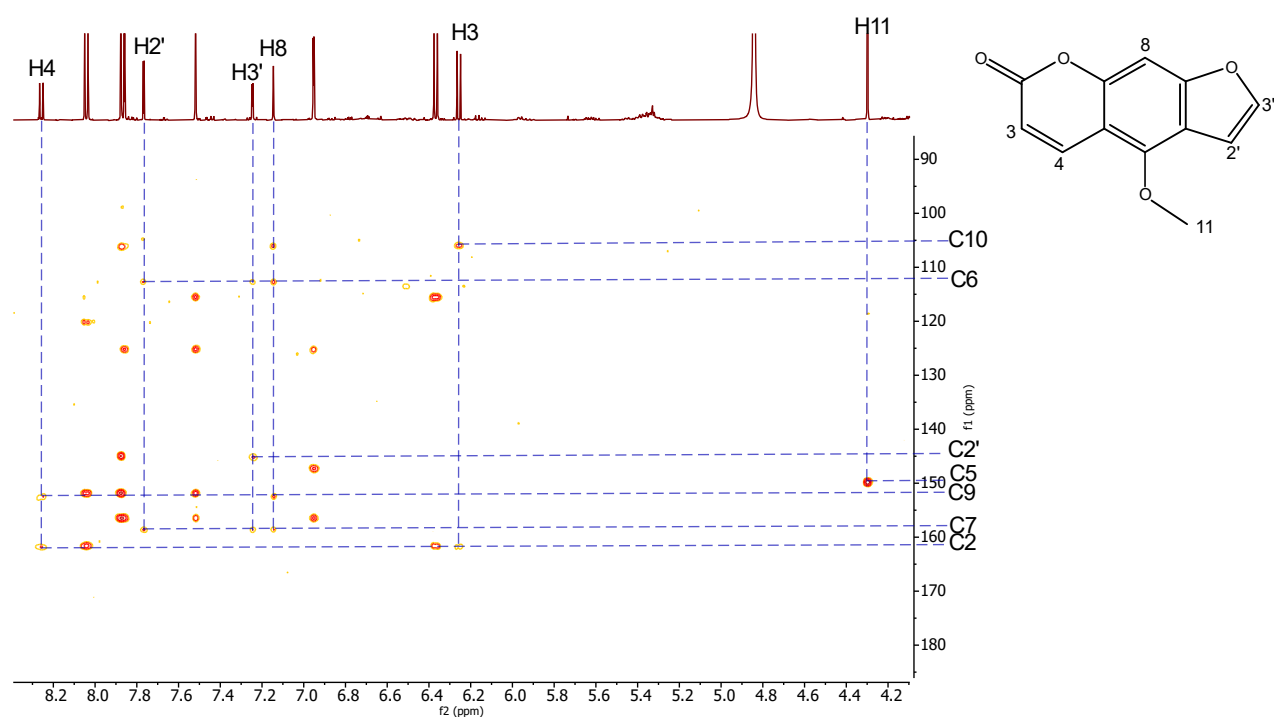

**Figure S2.** HMBC spectrum of *Ficus carica* chloroform fraction where  $^1\text{H}$ - $^{13}\text{C}$  correlations of bergapten are highlighted.

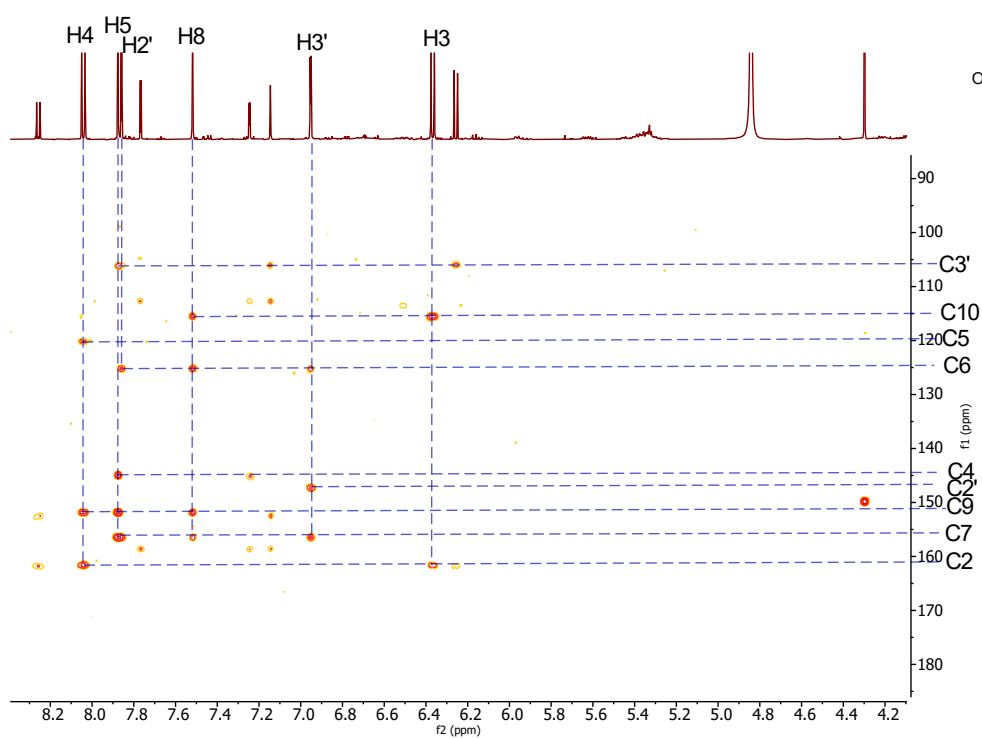

**Figure S3.** HMBC spectrum of *Ficus carica* chloroform fraction where  $^1\text{H}$ - $^{13}\text{C}$  correlations of psoralen are highlighted.

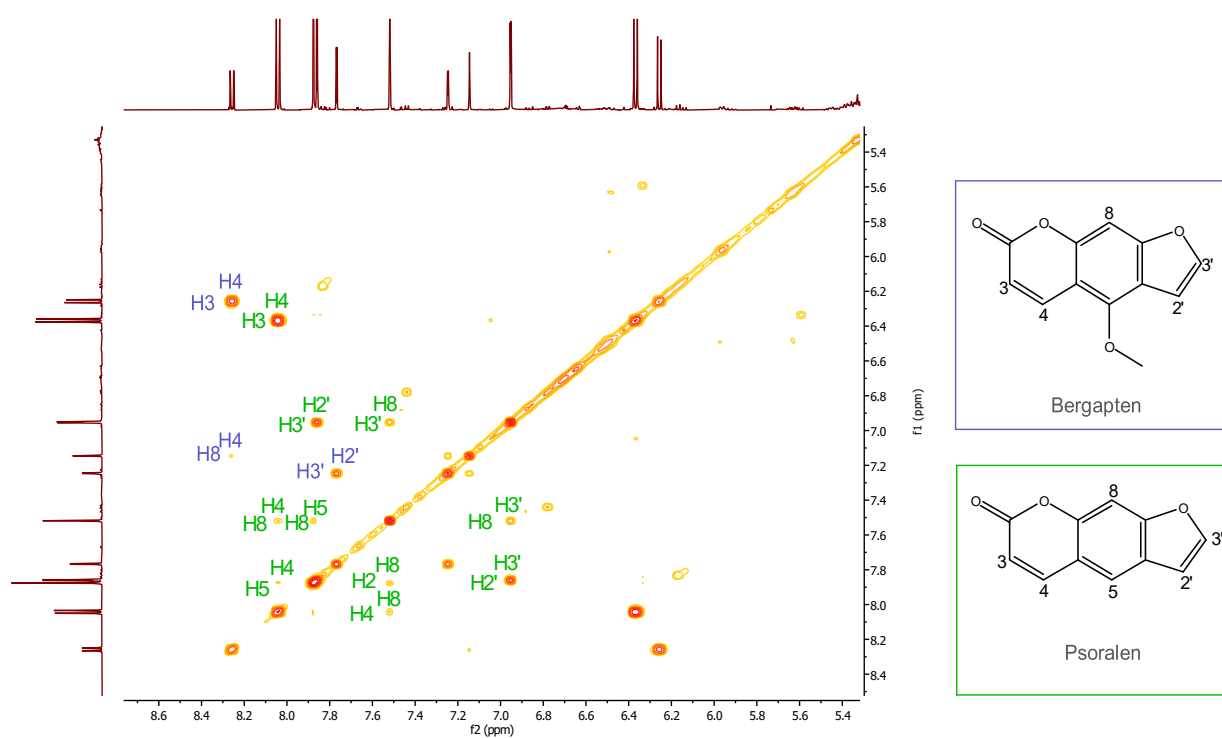

**Figure S4.** COSY spectrum of *Ficus carica* chloroform fraction where  $^1\text{H}$ - $^1\text{H}$  correlations of bergapten (blue) and psoralen (green) are highlighted.
